# Integrated Care Systems

*Psychiatric News* features highly informative content on the emerging practice model of integrated care.

Learn about:

- Predominant models of integrated care and the role psychiatrists play
- Working in integrated care settings
- Payment and delivery models
- APA resources on integrated care and delivery systems initiatives

For new psychiatrists entering the field, understanding the key role of systems of care has never been more important. Research published each month in *Psychiatric Services* will help residents play a vital role in the systems of care where they work, which is why the American Psychiatric Association provides psychiatric residents who are APA Members-in-Training full-text online access to *Psychiatric Services* content as a benefit.

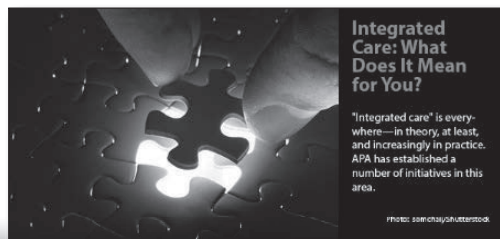

The screenshot shows the Psychiatric News website interface. At the top, there's a navigation bar with links like 'psychiatryonline', 'DSM Library', 'Books', 'Journals', 'Topics', 'APA Guidelines', 'CME & Self-Assessment', 'News', 'For Patients', 'My POL', and a search bar. Below this is the main header 'PSYCHIATRIC NEWS' with a sub-header 'From The American Psychiatric Association'. A search bar is also present. The main content area features the article title 'Integrated Care: What Does It Mean for You?' dated September 20, 2013. The article text discusses the concept of integrated care, its prevalence in theory and practice, and mentions APA's initiatives in this area, including the work of the Council on Healthcare Systems and Financing, the Network on Mental Health Policy Research, and the Center for Advancing Integrated Mental Health Solutions (AIMS).

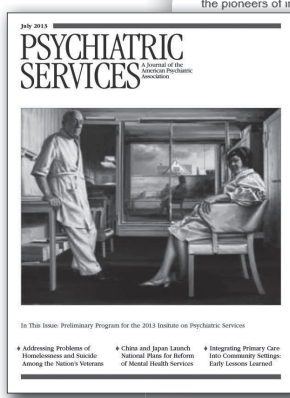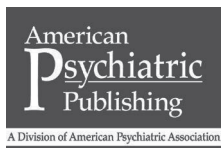

psychnews.psychiatryonline.org  
 www.appi.org • 1-800-368-5777 • Email: appi@psych.org

Priority Code AH1329
