# FOCUS

THE JOURNAL OF LIFELONG LEARNING IN PSYCHIATRY

## *Psychopharmacology: Evidence and Treatments*

*Guest Editors: Ana D. Stan, M.D., Ph.D.  
Carol A. Tamminga, M.D.*

### IN CLINICAL SYNTHESIS:

New Options for the Treatment of Schizophrenia

*Ana D. Stan, M.D., Ph.D.  
Carol A. Tamminga, M.D.*

Psychopharmacology of Bipolar II Depression and  
Bipolar Depression With Mixed Features

*Honor Hsin, M.D., Ph.D.  
Trisha Suppes, MD, Ph.D.*

Optimization of Treatment Algorithms for Clinical Depression

*Tracy L. Greer, Ph.D.  
Madhukar H. Trivedi, M.D.*

Advances in Psychopharmacology for Anxiety Disorders

*Amir Garakani, M.D.  
James W. Murrough, M.D.  
Dan V. Iosifescu, M.D., M.Sc.*

AND INFLUENTIAL PUBLICATIONS...
